# Supplementary material
Source: publisher figshare collection journal article supplement (https://karger.figshare.com/ndownloader/files/13755296)
Supplement: Supplementary file 1 [file 13755296]

**Table S1.** Systolic blood pressure (SBP), diastolic blood pressure (DBP), and number of tablets of antihypertensive drugs prescribed to patients before and after the initiation of hybrid therapy comprising peritoneal dialysis and hemodialysis

| Variable | Before | 1 year after | *P* | 2 years after | *P* | 3 years after | *P* |
| --- | --- | --- | --- | --- | --- | --- | --- |
| LEF group |  |  |  |  |  |  |  |
| SBP, *mmHg* | 147.2 ± 20.4 | 139.7 ± 21.4 | 0.4 | 145.6 ± 24.6 | 1.0 | 142.3 ± 21.0 | 1.0 |
| DBP, *mmHg* | 82.6 ± 14.6 | 77.1 ± 14.5 | 0.2 | 77.0 ± 17.5 | 0.2 | 75.9 ± 11.1 | 0.08 |
| Antihypertensive drugs, *n* | 0 (0–11) | 0 (0–10) | 0.4 | 0 (0–8) | 0.5 | 0 (0–10) | 0.06 |
| NEF group |  |  |  |  |  |  |  |
| SBP, *mmHg* | 151.1 ± 25.2 | 146.1 ± 26.0 | 0.7 | 142.1 ± 23.6 | 0.03 | 145.5 ± 21.0 | 0.5 |
| DBP, *mmHg* | 80.3 ± 14.0 | 79.4 ± 15.8 | 1.0 | 77.9 ± 16.3 | 1.0 | 78.0 ± 11.1 | 1.0 |
| Antihypertensive drugs, *n* | 0 (0–14) | 0 (0–12) | 0.2 | 1 (0–14) | 0.1 | 0 (0–14) | 0.05 |

Note: Patients were divided into the lower ejection fraction (LEF; left ventricular ejection fraction [LVEF] <60%) and normal ejection fraction (NEF; LVEF ≥60%) groups at the initiation of hybrid therapy comprising peritoneal dialysis and hemodialysis. Data are expressed as mean ± standard deviation, the median (range), and numbers for variables. Generalized linear mixed models were used for comparisons of the longitudinal data for SBP and DBP to account for the correlation across time for each patient and for patients with missing data. Wilcoxon signed-rank test with a Bonferroni correction was used for the comparisons of the longitudinal data for the numbers of antihypertensive drugs to account for the correlation across time for each patient and the drug data having non-normal distribution (every *P* adjusted for multiple comparisons by Bonferroni, compared with before the initiation of hybrid therapy). Abbreviations: DBP, diastolic blood pressure; SBP, systolic blood pressure.
